# Supplementary material
Source: publisher figshare collection journal article supplement (https://tandf.figshare.com/ndownloader/files/11183870)
Supplement: Supplementary file 1 [file 11183870]

| **Agr. verb** | **Match** | **Missmatch** |
| --- | --- | --- |
|  |  |  |
| **help** | pupil ix3a mathematics problem. today homework 1help3a | ... 1help3b |
|  | my grandma ix3a old. therefore shopping 1help3a | ... 1help3b |
|  | my friend ix3a stressed. maybe work 1help3a | ... 1help3b |
|  | child ix3a helpless. shoes tying 1help3a | ... 1help3b |
|  |  |  |
| **give** | my mother ix3a miss 3apam1. picture new 1give3a | ... 1give3b |
|  | beggar ix3a poor. yesterday 10-euro banknote 1give3a | ... 1give3b |
|  | my friend ix3a sick bored. book interesting 1give3a | ... 1give3b |
|  | my neighbor ix3a trustworthy. my house#key 1give3a | ... 1give3b |
|  |  |  |
| **visit** | my grandma ix3a sick. today evening 1visit3a | ... 1visit3b |
|  | german#deaf#club president ix3a deaf. next week 1visit3a | ... 1visit3b |
|  | my work#colleague ix3a sick. patience soon 1visit3a | ... 1visit3b |
|  | my friend ix3a pregnant. tomorrow noon 1visit3a | ... 1visit3b |
|  |  |  |
| **give (as present)** | my grandpa ix3a birthday. cigar expensive 1give-present3a | ... 1give-pr3b |
|  | my partner ix3a faithful. ring gold 1give-present3a | ... 1give-pr3b |
|  | child ix3a sad. therefore chocolate 1give-present3a | ... 1give-pr3b |
|  | my aunt ix3a silver#wedding. ikea coupon 1give-present3a | ... 1give-pr3b |
|  |  |  |
| **fax** | my boss ix3a nervous. now work#contract 1fax3a | ... 1fax3b |
|  | interpreter ix3a super. job important 1fax3a | ... 1fax3b |
|  | my friend ix3a city#area no-clue. today map 1fax3a | ... 1fax3b |
|  | my brother ix3a curious. quick letter 1fax3a | ... 1fax3b |
|  |  |  |
| **ask** | my sister ix3a mathematics clever. topic percent calculation 1ask3a | ... 1ask3b |
|  | my grandma ix3a cook super. cake recipe 1ask3a | ... 1ask3b |
|  | my uncel ix3a policeman. direction description 1ask3a | ... 1ask3b |
|  | woman ix3a signlanguage#lecturer. sign new 1ask3a | ... 1ask3b |
|  |  |  |
| **explain** | child ix3a mathematics problem. content step-by-step 1explain3a | ... 1explain3b |
|  | lawyer ix3a neutral. situation accident 1explain3a | ... 1explain3b |
|  | trainee ix3a no-clue. machine difficult 1explain3a | ... 1explain3b |
|  | my colleague deaf#field interested. deaf#culture 1explain3a | ... 1explain3b |
|  |  |  |
| **lend** | my partner studying. book important 1lend3a | ... 1lend3b |
|  | my sister ix3a broke. 100 euro 1lend3a | ... 1lend3b |
|  | my friend ix3a cold. jacket warm 1lend3a | ... 1lend3b |
|  | my son ix3a grown-up. my car 1lend3a | ... 1lend3b |
|  |  |  |
| **send** | my daughter ix3a tomorrow birthday. letter long 1send3a | ... 1send3b |
|  | woman ix3a nice. wish sms 1send3a. | ... 1send3b |
|  | professor ix3a good-natured. homework gladly 1send3a | ... 1send3b |
|  | artist ix3a super. my drawing picture 1send3a | ... 1send3b |
|  |  |  |
| **inform** | *my father ix3a soccer fan. next match date 1inform3a | *... 1inform3b |
|  | my boss ix3a stressed. therefore daily#routine 1inform3a | ... 1inform3b |
|  | my mother ix3a surprised. today move 1inform3a | ... 1inform3b |
|  | child ix3a naughty. punishment house#arrest 1inform3a | ... 1inform3b |
|  |  |  |

**Appendix A: Comprehensive list of stimulus items**

| **Plain verb** | **Match** | **Mismatch** | **Body-anc.** | **Loc of art.** |
| --- | --- | --- | --- | --- |
|  |  |  |  |  |
| **like** | i teddy like | ... like3a | yes | chest |
|  | i flower like | ... like3a |  |  |
|  | i sofa like | ... like3a |  |  |
|  | i dog like | ... like3a |  |  |
|  |  |  |  |  |
| **love** | i my partner love | ... love3a | yes | chest |
|  | i grandpa love | ... love3a |  |  |
|  | i father love | ... love3a |  |  |
|  | i cat love | ... love3a |  |  |
|  |  |  |  |  |
| **wait** | i friend wait | ... wait3a | yes | chest |
|  | i grandma wait | ... wait3a |  |  |
|  | i grandpa wait | ... wait3a |  |  |
|  | i father wait | ... wait3a |  |  |
|  |  |  |  |  |
| **play** | i tennis play | ... play3a | no | neutral space |
|  | i cards play | ... play3a |  |  |
|  | i chess play | ... play3a |  |  |
|  | i soccer play | ... play3a |  |  |
|  |  |  |  |  |
| **understand** | i america sign understand | ... understand3a | no | head |
|  | i problem understand | ... understand3a |  |  |
|  | i connection understand | ... understand3a |  |  |
|  | i mathematics understand | ... understand3a |  |  |
|  |  |  |  |  |
| **buy** | i book buy | ... buy3a | no | neutral space |
|  | i appel buy | ... buy3a |  | (non-dom hand) |
|  | *i laptop buy | *... buy3a |  |  |
|  | i bread buy | ... buy3a |  |  |
|  |  |  |  |  |
| **know** | i man ix3a know | ... know3a | yes | head |
|  | i problem ix3a know | ... know3a |  |  |
|  | i doctor ix3a know | ... know3a |  |  |
|  | i situation ix3a know | ... know3a |  |  |
|  |  |  |  |  |
| **grasp** | i homework grasp | ... grasp3a | no | head |
|  | i topic grasp | ... grasp3a |  |  |
|  | i problem grasp | ... grasp3a |  |  |
|  | i sign grasp | ... grasp3a |  |  |
|  |  |  |  |  |
| **forget** | i topic forget | ... forget3a | no | head |
|  | i sign forget | ... forget3a |  |  |
|  | i egg forget | ... forget3a |  |  |
|  | i appointment forget | ... forget3a |  |  |
|  |  |  |  |  |
| **test** | i boy test | ... test3a | no | neutral space |
|  | i homework test | ... test3a |  | (non-dom hand) |
|  | i girl test | ... test3a |  |  |
|  | i car test | ... test3a |  |  |
|  |  |  |  |  |
| **plan** | i vacation plan | ... plan3a | no | neutral space |
|  | i presentation plan | ... plan3a |  | (non-dom hand) |
|  | i relocation plan | ... plan3a |  |  |
|  | i party plan | ... plan3a |  |  |
|  |  |  |  |  |
